# Supplementary material for: C1q/TNF-related protein 5 contributes to diabetic vascular endothelium dysfunction through promoting Nox-1 signaling
Source: PubMed Central journal article supplement — Redox Biol. 2020 Feb 24;34:101476. doi: 10.1016/j.redox.2020.101476 (PMC7327962; doi:10.1016/j.redox.2020.101476), 2020-02-24
Supplement: mmc1.pdf [file mmc1.pdf]

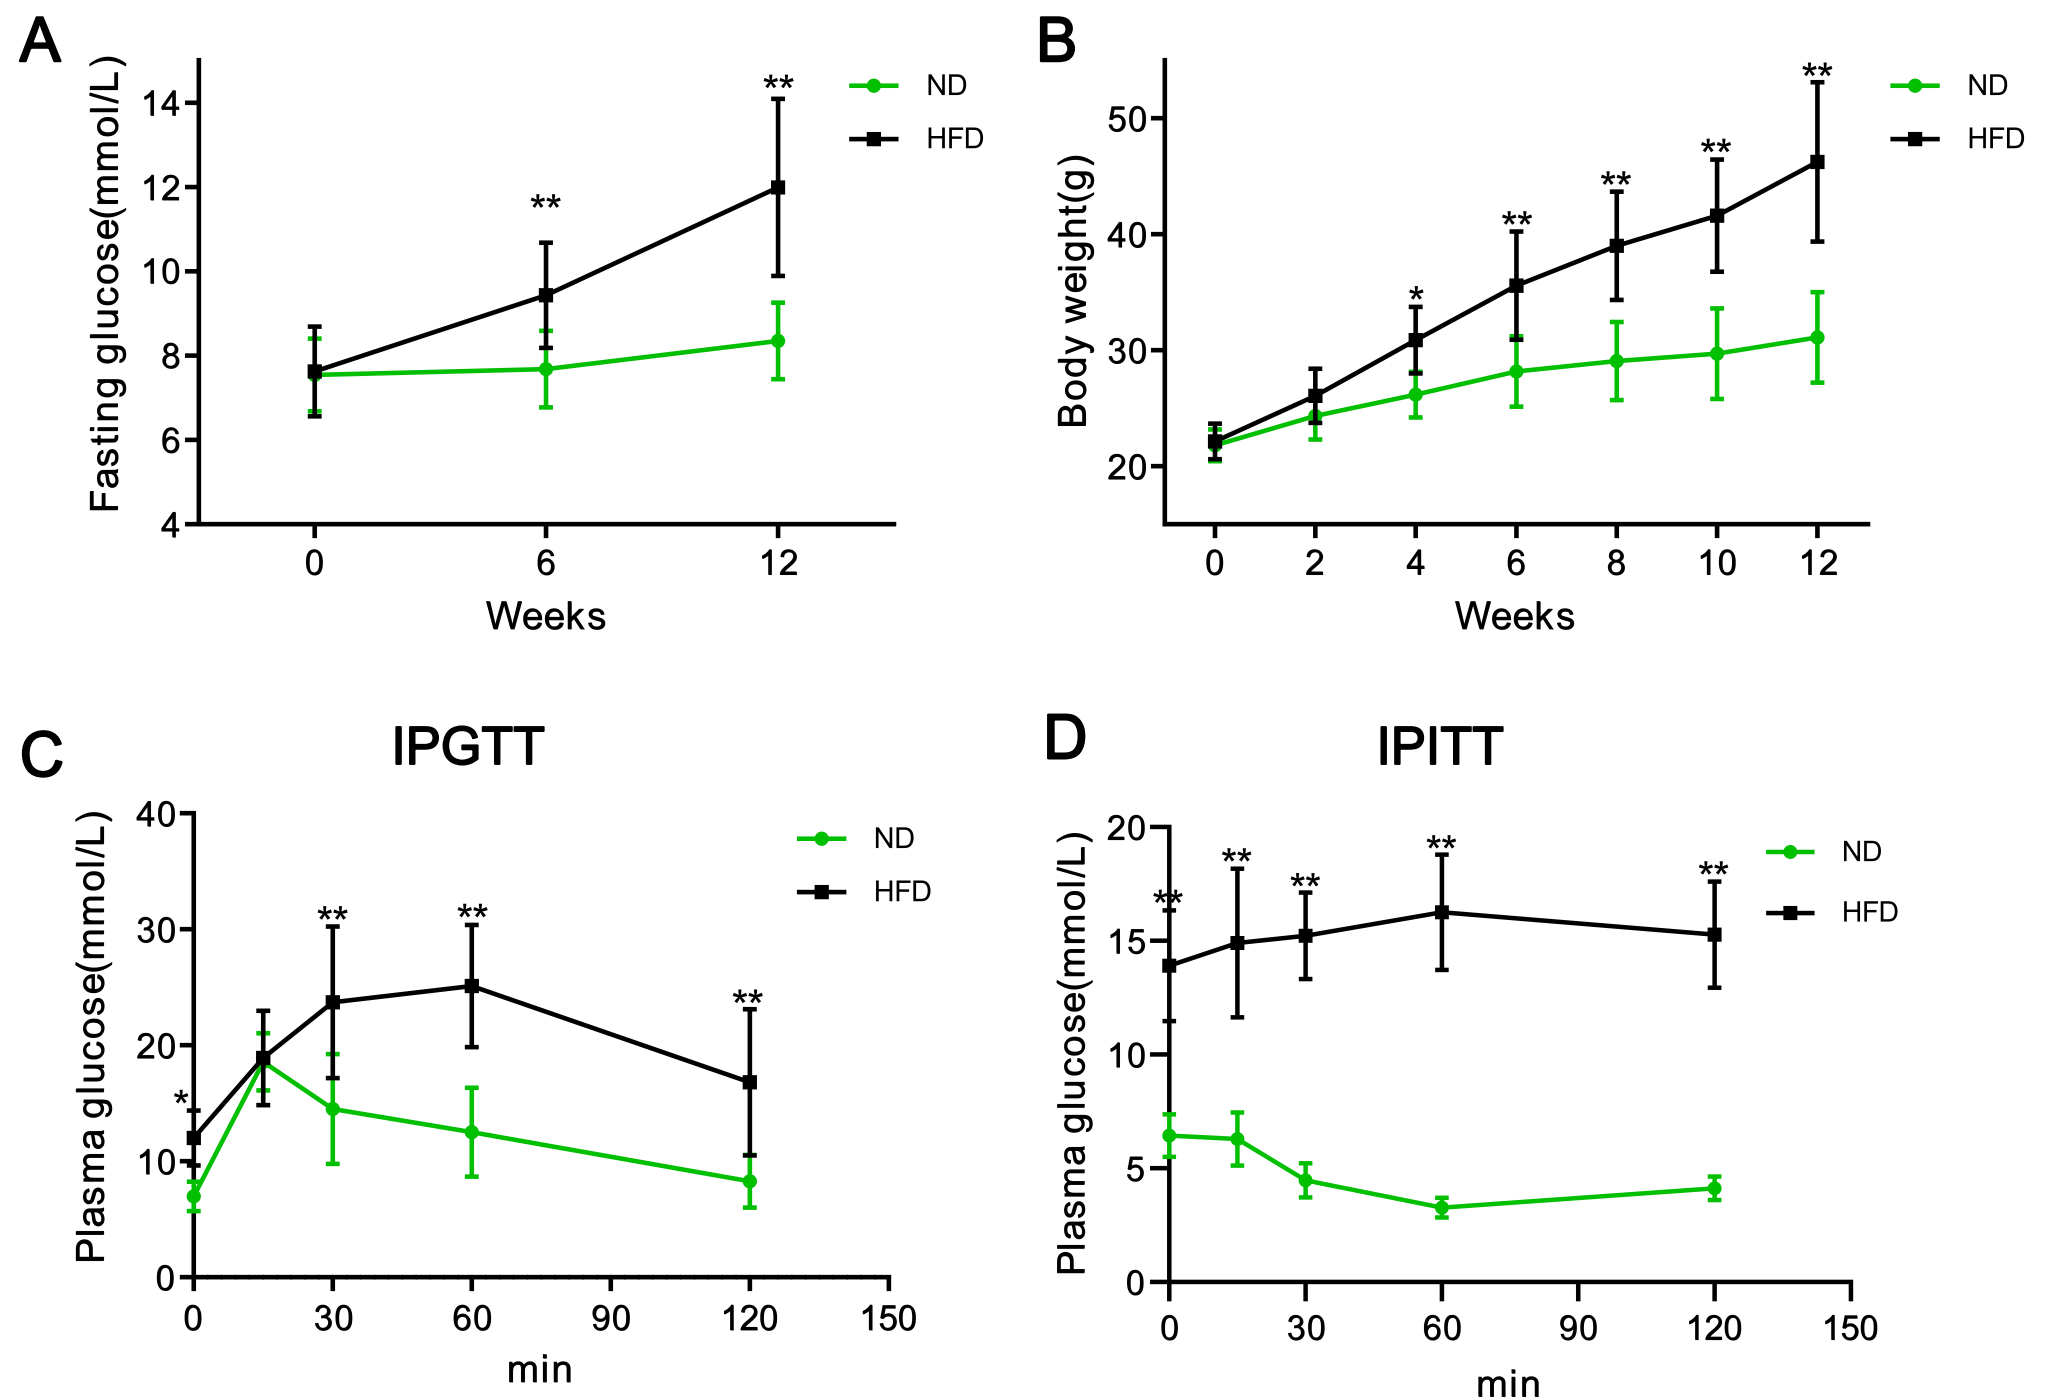

**Supplemental Figure 1. Induction of type 2 diabetic mice model.** *Apoe*<sup>-/-</sup> mice were fed with HFD for 12 weeks to induce type 2 diabetes mice model. **A** The fasting glucose level. **B** Body weight graph exhibited obesity at 12 weeks for the HFD group. **C** IPGTT exhibited abnormal blood glucose tolerance. **D** IPITT exhibited insulin resistance. n=10. \*\**p* < 0.01, \**p* < 0.05 vs. ND. Data were expressed as mean ± SD. ND, normal diet; HFD, high-fat diet; IPITT, Interaperitoneal insulin tolerance test; IPGTT, Intraperitoneal glucose tolerance test.

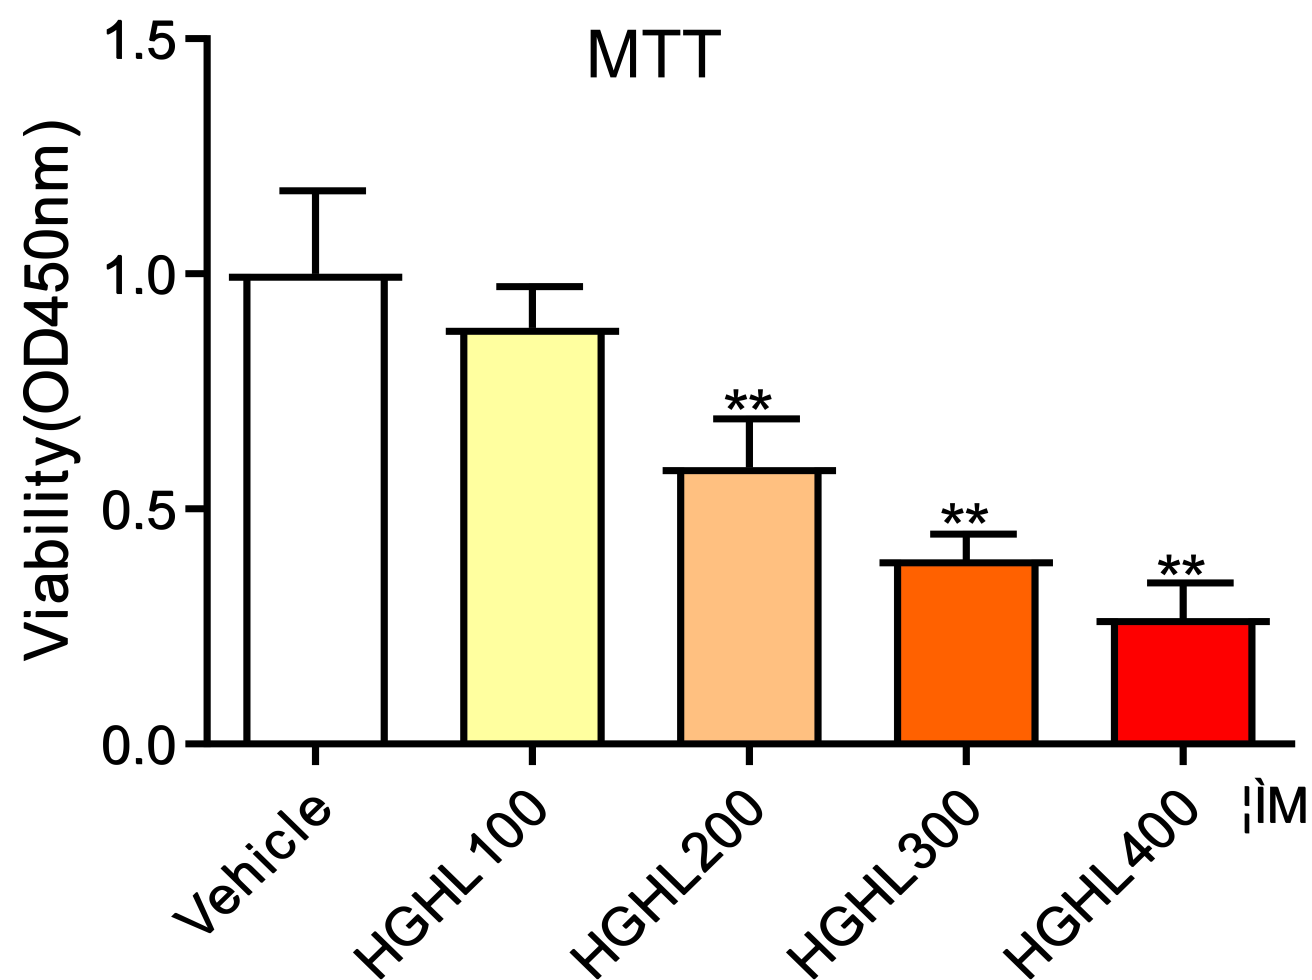

**Supplemental Figure 2. HGHL resulted in decreased vascular endothelial cell viability in a dose-dependent manner.**

MTT exhibited cell viability of HUVECs treated with vehicle or different doses of HGHL (D-glucose: 25mM; palmitate: 100-400μM). n=5. \*\*p < 0.01 vs. vehicle. Results were expressed as mean  $\pm$  SD. HUVEC, human umbilical vein cells; HGHL, high glucose and high lipid.
